# Supplementary material for: Biodiversity and Economy but Not Social Factors Predict Human Population Dynamics in South Africa
Source: Preprints.org preprint supplement (doi:10.20944/preprints202206.0011.v1), 2022-06-01
Supplement: Supplementary file 1 [file supplementary]

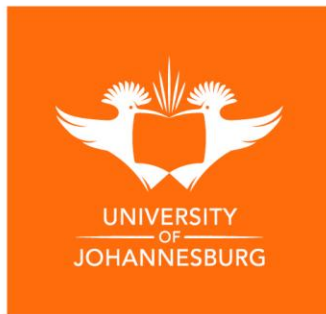

FACULTY OF SCIENCE

FACULTY ETHICS COMMITTEE

**Ethics Reference Number: 2022-02-04/Phogole\_Yessoufou**

**Student:** B.T. Phogole (201598484)  
**Supervisor:** Prof K. Yessoufou  
**Department:** GEMES  
**Title:** Investigating the sustainability values of urban greenspace in the face of human population growth and covid-19 pandemic in South Africa.  
**Qualification:** PhD in Environmental Management

11 March 2022

Dear B.T. Phogole

**Re: Feedback on your revised application for ethical clearance**

**Status – Approved**

With reference to your application for ethical clearance to use humans for testing/research purposes that originally served on 4 February 2022, the Ethics Committee of the Faculty of Science, University of Johannesburg, reviewed and approved the revised application with the following notes:

**Note:** Commencement/execution of this project is dependent on the following:

1. Adherence to all Government and UJ regulations related to the COVID-19 pandemic.
2. Adherence to the POPIA.
3. Where/if applicable, following UJ regulations when using social media platforms.

Sincerely yours

Prof Cobus Van Dyk  
Chair: Faculty of Science Ethics Committee  
University of Johannesburg
