# Supplementary material for: Biodiversity and Economy but Not Social Factors Predict Human Population Dynamics in South Africa
Source: Preprints.org preprint supplement (doi:10.20944/preprints202206.0011.v1), 2022-06-01
Supplement: Supplementary file 1 [file Supplementary Information.doc]

# Supplementary Document

**Table S1**: Variables used in this study as well as their indicators and sources

| **Sustainability pillars** | **Variables** | **Indicators** | **Acronym for indicators** | **Method of measurement** | **Data source** |
| --- | --- | --- | --- | --- | --- |
| Environmental | Biodiversity and Habitat | Total area of all Marine Protected Areas in a country | AMP | The percentage of a  country’s total exclusive economic zone (EEZ) designated as marine protected  areas (MPAs) | URL: http://www.protectedplanet.net |
| Protected Areas Representativeness Index | PAR | The proportion of biologically scaled environmental diversity included in a  country’s terrestrial protected areas. | Source: Commonwealth Scientific and Industrial Research Organization  URL: https://data.csiro.au/ |
| Species Habitat Index | SHI | The proportion of suitable habitat  within a country that remains intact for each species in that country relative to a baseline set in the year 2001. | Source: Map of Life  URL: https://mol.org/indicators/ |
| Species Protection Index | SPI | The proportion of the country’s protected area network that is suitable for specified 30 000 terrestrial vertebrate, invertebrate, and plant species. | Source: Map of Life  URL: https://mol.org/indicators |
| FSS Fish stock status [%] | FSS | The percentage of a country’s total catch that comes from overexploited or collapsed stocks, considering all fish stocks within a country’s EEZs. | Source: Sea Around Us  URL: <http://www.seaaroundus.org/> |
| Fish catch [tonnes] | CTH | Fish catch [tonnes]. | Source: Sea Around Us  URL: <http://www.seaaroundus.org/> |
| Terrestrial protected areas | TPA | % of total land area that are totally or partially protected areas of at least 1,000 hectares that are designated by national authorities as scientific reserves with limited public access, national parks, natural monuments, nature reserves or wildlife sanctuaries, protected landscapes, and areas managed mainly for sustainable use. | Source World Database on Protected Areas |
| Wetland area [km2] | WTA | Total Wetland area [km2]. | Source: European Space Agency  URL: <https://maps.elie.ucl.ac.be/CCI/viewer/> |
| Grassland area [km2] | GRA | Total Grassland area [km2]. | Source: European Space Agency  URL: <https://maps.elie.ucl.ac.be/CCI/viewer/> |
| Air pollution | Black Carbon Emissions [Gg | BLC | Black Carbon Emissions [Gg]. | URL: https://www.geosci-model-dev.net/11/369/2018/gmd-11-369-2018.html |
| SO2 emissions [Gg] | SO2 | SO2 emissions [Gg] | Source: Community Emissions Data Systems  URL: https://zenodo.org/record/3606753 |
| CO2 emissions from land cover change | CDL | CO2 emissions [Gg] from land cover change | Source: Mullion Group  URL: https://flintpro.com/Global-Run |
| Methane emissions [Gg] | CH4 | Total Methane emissions [Gg] | Source: Potsdam Institute for Climate Impact Research  URL: http://dataservices.gfzpotsdam.  de/pik/showshort.php?id=escidoc:4736895 |
| Fluorinated-gasses emissions [Gg CO2-eq.] | FOG | Fluorinated gasses emissions [Gg CO2-eq.] | Source: Potsdam Institute for Climate Impact Research  URL: http://dataservices.gfzpotsdam.  de/pik/showshort.php?id=escidoc:4736895 |
| N2O emissions [Gg] | NOT | N2O emissions [Gg] | Source: Potsdam Institute for Climate Impact Research  URL: http://dataservices.gfzpotsdam.  de/pik/showshort.php?id=escidoc:4736895 |
| NOx emissions [Gg] | NOX | NOx emissions [Gg] | Source: Community Emissions Data Systems  URL: <https://zenodo.org/record/3606753> |
| Environmental Management | Sustainable Nitrogen Management Index | SNM | The balance between the efficient application of nitrogen fertilizer with maximum crop yields as a measure of the environmental performance of agricultural production. | Source: University of Maryland Center for Environmental Science  URL: <http://research.al.umces.edu/xzhang/> |
| Social | Governance | Control of Corruption | CCO | Measures the perceptions of the extent to which public power is exercised for private gain, including both petty and grand forms of corruption, as well as "capture" of the state by elites and private interests. | URL: <https://databank.worldbank.org/source/worldwide-governanceindicators> |
| Government Effectiveness | GOE | Measures the perceptions of the quality of public services, the quality of the civil service and the degree of its independence from political pressures, the quality of policy formulation and implementation, and the credibility of the government's commitment to such policies. | Source: Worldwide Governance Indicators  URL: <https://databank.worldbank.org/source/worldwide-governanceindicators> |
| Rule of Law | ROL | Measures perceptions of the extent to which agents have confidence in and abide by the rules of society, and in particular the quality of contract enforcement, property rights, the police, and the courts, as well as the likelihood of crime and violence. | Source: Worldwide Governance Indicators  URL: <https://databank.worldbank.org/source/worldwide-governanceindicators> |
| Regulatory Quality | RQU | Measures perceptions of the ability of the government to formulate and implement sound policies and regulations that permit and promote private sector development. | Source: Worldwide Governance Indicators  URL: <https://databank.worldbank.org/source/worldwide-governanceindicators> |
| Political Stability and the Absence of Violence | SAV | Measures perceptions of the likelihood of political instability and/or politically motivated violence, including terrorism. | Source: Worldwide Governance Indicators  URL: <https://databank.worldbank.org/source/worldwide-governanceindicators> |
| Voice and Accountability | VOA | Measures perceptions of the extent to which a country's citizens are able to participate in selecting their government, as well as freedom of expression, freedom of association, and a free media. | Source: Worldwide Governance Indicators  URL: <https://databank.worldbank.org/source/worldwide-governanceindicators> |
| Economic | Economy | Services, value added (% of GDP) | SEG | Services, value added (% of GDP): Services correspond to ISIC divisions 50-99 and they include value added in wholesale and retail trade (including hotels and restaurants), transport, and government, financial, professional, and personal services such as education, health care, and real estate services, imputed bank service charges, and import duties. | Source: World Bank  URL: <https://databank.worldbank.org/source/world-development-indicators> |
| Total area of all Economic Exclusion Zones in a country | EEZ | Total area of all Economic Exclusion Zones in a country. | Source: World Database on Protected Areas  URL: <http://www.marineregions.org/> |
| GDP [PPP, USD2011] | GDP | Gross Domestic Product (USING 2011$) | URL: [https://databank.worldbank.org/data/source/world-developmentindicators#](https://databank.worldbank.org/data/source/world-developmentindicators)  AND  <https://www.imf.org/external/pubs/ft/weo/2019/01/weodata/index> |
| Index of Economic Freedom | IEF | Measures four pillars of economic freedom including rule of law, government size, regulatory efficiency, and open markets. | Source: Heritage Foundation  URL: https://www.heritage.org/index/explore |

**Table S3: The results of the stepwise regression with population as the response variable (Indicator Selection Method 1). *Indicators in red are selected as an indicator for each predictor variable; p-values highlighted in green are significant as per our chosen threshold (p<0.05).**

| **Indicator** | **Full name** | **Predictor Variable** | **Pillar/Aspect of sustainability** | **Estimate** | **Std. Error** | **t value** | **Pr(>|t|)** | **AIC** | **Residual deviance (RD)** | **Degrees of freedom (DF)** |
| --- | --- | --- | --- | --- | --- | --- | --- | --- | --- | --- |
| AMP | Marine Protected Area | Biodiversity and Habitat | Environment | 0,6782 | 0,1389 | 4,884 | 3,81E-05 | 71,634 | 15,66 | 28 |
| PAR | Protected Areas | Environment | 0,2832 | 0,1812 | 1,563 | 0,129 | 87,611 | 26,674 | 28 |
| SHI | Species Habitat Index | Environment | -0,3465 | 0,1773 | -1,955 | 0,0607 | 86,282 | 25,518 | 28 |
| **SPI** | **Species Protection Index** | Environment | 0,9567 | 0,055 | 17,39 | 2E-16 | 16,064 | 2,4566 | 28 |
| FSS | Fish Stock | Environment | -5,47E-01 | 1,58E-01 | -3,453 | 0,0017 | 79,475 | 20,338 | 28 |
| CTH | Fish Catch | Environment | -1,04E-02 | 1,89E-01 | -0,055 | 0,957 | 90,116 | 28,997 | 28 |
| TPA | Terrestrial Protected Areas | Environment | 1,09E-01 | 1,88E-01 | 0,58 | 0,566 | 89,761 | 28,656 | 28 |
| WTA | Wetland Area | Environment | 8,09E-01 | 1,11E-01 | 7,279 | 6,33E-08 | 58,256 | 10,026 | 28 |
| GRA | Grassland Area | Environment | 5,79E-01 | 1,54E-01 | 3,762 | 0,000793 | 77,848 | 19,264 | 28 |
| **CH4** | **Methane emissions** | Air pollution | Environment | 9,01E-01 | 8,21E-02 | 10,98 | 1,18E-11 | 40,063 | 5,4671 | 28 |
| FOG | Fluorinated Gases emissions | Environment | 8,80E-01 | 8,97E-02 | 9,819 | 1,44E-10 | 45,379 | 6,5271 | 28 |
| NOT | N2O Emissions | Environment | -3,07E-01 | 1,80E-01 | -1,705 | 0,0993 | 87,157 | 26,273 | 28 |
| NOX | NOX Emissions | Environment | 8,51E-01 | 9,93E-02 | 8,568 | 2,60E-09 | 51,512 | 8,0077 | 28 |
| BLC | Black Carbon emissions | Environment | 0,7674 | 0,1212 | 6,333 | 7,5E-07 | 63,45 | 11,921 | 28 |
| SO2 | Sulphur dioxide emissions | Environment | 0,7318 | 1,29E-01 | 5,682 | 4,33E-06 | 67,115 | 13,47 | 28 |
| CDL | CO2 from, land cover changes | Environment | 1,41E-02 | 1,89E-01 | 0,075 | 9,41E-01 | 90,113 | 28,994 | 28 |
| **SNM** | **Sustainable Nitrogen Management** | Environmental Management | Environment | -8,21E-01 | 1,08E-01 | -7,611 | 2,73E-08 | 56,479 | 9,4494 | 28 |
| **CCO** | **Control on Corruption** | Governance | Social | -8,00E-01 | 1,14E-01 | -7,046 | 1,16E-07 | 59,523 | 10,459 | 28 |
| GOE | Government Effectiveness | Social | -8,23E-01 | 1,07E-01 | -7,672 | 2,34E-08 | 56,155 | 9,3479 | 28 |
| ROL | Rule of Law | Social | -5,12E-01 | 1,62E-01 | -3,158 | 0,00379 | 80,981 | 21,385 | 28 |
| RQU | Regulatory Quality | Social | -3,50E-01 | 1,77E-01 | -1,978 | 0,0579 | 86,196 | 25,445 | 28 |
| SAV | Political Stability and Absence of Violence | Social | 5,49E-01 | 1,58E-01 | 3,473 | 0,00169 | 79,371 | 20,268 | 28 |
| VOA | Voice and Accountability | Social | -6,96E-01 | 1,36E-01 | -5,131 | 1,94E-05 | 70,236 | 14,947 | 28 |
| SEG | Services, value added | Economy | Economy | 7,94E-01 | 1,15E-01 | 6,913 | 1,63E-07 | 60,247 | 10,714 | 28 |
| EEZ | Area of economic exclusion zone | Economy | -3,40E-01 | 1,78E-01 | -1,91 | 0,0664 | 86,444 | 25,656 | 28 |
| **GDP** | **Gross Domestic Product** | Economy | 9,78E-01 | 3,92E-02 | 24,97 | <2e-16 | -4,2861 | 1,2466 | 28 |
| IEF | Economic Freedom | Economy | -1,29E-01 | 1,87E-01 | -0,688 | 0,497 | 89,617 | 28,518 | 28 |

**Table S4**: The pairwise regression of indicators for each variable (Indicator Selection Method 2). The indicators highlighted in yellow were selected for further analysis using SEM, and the regression coefficients that are written in bold are considered to be strongly significant (coefficient ≥0.5).

| **Air pollution Indicators** | | | | | | | |
| --- | --- | --- | --- | --- | --- | --- | --- |
|  | BLC | SO2 | CDL | CH4 | FOG | NOT | NOX |
| BLC | 1 | **0.6681889** | 0.04880521 | **0.77049** | **0.72389225** | -0.4198329 | **0.6676694** |
| SO2 | **0.66818892** | 1 | -0.30105113 | **0.8205614** | **0.76369718** | -0.2811769 | **0.8113439** |
| CDL | 0.04880521 | -0.3010511 | 1 | -0.203597 | -0.02501129 | -0.3991518 | -0.1680452 |
| CH4 | **0.77048998** | **0.8205614** | -0.20359702 | 1 | **0.85927413** | -0.370585 | **0.7572416** |
| FOG | **0.72389225** | **0.7636972** | -0.02501129 | **0.8592741** | 1 | -0.4290967 | **0.8327023** |
| NOT | -0.41983293 | -0.2811769 | -0.39915184 | -0.370585 | -0.42909671 | 1 | -0.3180247 |
| NOX | **0.66766941** | **0.8113439** | -0.1680452 | **0.7572416** | **0.83270235** | -0.3180247 | 1 |

| **Biodiversity and Habitat Indicators** | | | | | | | | | |
| --- | --- | --- | --- | --- | --- | --- | --- | --- | --- |
|  | AMP | PAR | SHI | SPI | FSS | CTH | TPA | WTA | GRA |
| AMP | 1 | 0.25616997 | -0.45011284 | **0.9224439** | -0.3746685 | 0.02337628 | **0.86058643** | **0.73665528** | 0.2501081 |
| PAR | 0.25616997 | 1 | -0.48811425 | 0.1953631 | 0.2658486 | 0.10170223 | 0.18979752 | 0.06956712 | -0.2167721 |
| SHI | -0.45011284 | -0.48811425 | 1 | -0.2671564 | -0.1817698 | -0.07770803 | -0.4483571 | -0.39247833 | 0.1985913 |
| SPI | **0.9224439** | 0.1953631 | -0.26715635 | 1 | -0.4738367 | -0.0135797 | **0.80607477** | **0.70571227** | 0.3652156 |
| FSS | -0.3746685 | 0.26584863 | -0.18176979 | -0.4738367 | 1 | -0.49665851 | -0.3342241 | -0.60980502 | -0.9068524 |
| CTH | 0.02337628 | 0.10170223 | -0.07770803 | -0.0135797 | -0.4966585 | 1 | -0.0596616 | 0.2198953 | **0.535591** |
| TPA | **0.86058643** | 0.18979752 | -0.44835708 | **0.8060748** | -0.3342241 | -0.05966163 | 1 | **0.64302436** | 0.2322682 |
| WTA | **0.73665528** | 0.06956712 | -0.39247833 | **0.7057123** | -0.609805 | 0.2198953 | **0.64302436** | 1 | **0.5680856** |
| GRA | 0.25010808 | -0.21677205 | 0.19859135 | 0.3652156 | -0.9068524 | **0.53559098** | 0.23226819 | **0.56808558** | 1 |

| **Governance indicators** | | | | | | |
| --- | --- | --- | --- | --- | --- | --- |
|  | CCO | GOE | ROL | RQU | SAV | VOA |
| CCO | 1 | **0.7989289** | 0.12678412 | 0.29321883 | -0.77150961 | **0.8470066** |
| GOE | **0.7989289** | 1 | 0.1938867 | **0.5311315** | -0.62273698 | **0.6834758** |
| ROL | 0.1267841 | 0.1938867 | 1 | 0.03244871 | -0.08411545 | 0.2653638 |
| RQU | 0.2932188 | **0.5311315** | 0.03244871 | 1 | -0.02357546 | 0.2049624 |
| SAV | -0.7715096 | -0.622737 | -0.08411545 | -0.02357546 | 1 | -0.8140394 |
| VOA | **0.8470066** | **0.6834758** | 0.26536379 | 0.20496242 | -0.81403943 | 1 |

| **Economy indicators** | | | | |
| --- | --- | --- | --- | --- |
|  | **SEG** | **EEZ** | **GDP** | **IEF** |
| SEG | 1 | -0.6994902 | **0.8716323** | -0.277592 |
| EEZ | -0.6994902 | 1 | -0.6757837 | 0.2236042 |
| GDP | **0.8716323** | -0.6757837 | 1 | -0.2397507 |
| IEF | -0.277592 | 0.2236042 | -0.2397507 | 1 |

**Table S5:** AIC and BIC values for each of the 135 SEMs resulting from the selected indicator combinations in Figure S2.

| **N° combinations of indicators** | **Air Pollution** | **Biodiversity and Habitat** | **Economy** | **Governance** | **Akaike (AIC)** | **Bayesian (BIC)** |
| --- | --- | --- | --- | --- | --- | --- |
| 1 | CH4 | WTA | GDP | GOE | 207.809 | 228.827 |
| 2 | CH4 | WTA | GDP | ROL | 229.516 | 250.534 |
| 3 | CH4 | WTA | IEF | GOE | 310.707 | 331.725 |
| 4 | CH4 | WTA | IEF | ROL | 332.749 | 353.767 |
| 5 | CH4 | PAR | GDP | GOE | 254.285 | 275.302 |
| 6 | CH4 | PAR | GDP | ROL | 278.660 | 299.678 |
| 7 | CH4 | PAR | IEF | GOE | 353.848 | 374.866 |
| 8 | CH4 | PAR | IEF | ROL | 374.731 | 395.749 |
| 9 | CH4 | SHI | GDP | GOE | 241.961 | 262.979 |
| 10 | CH4 | SHI | GDP | ROL | 268.925 | 289.943 |
| 11 | CH4 | SHI | IEF | GOE | 349.857 | 370.875 |
| 12 | CH4 | SHI | IEF | ROL | 378.005 | 399.023 |
| 13 | CH4 | CTH | GDP | GOE | 259.161 | 280.179 |
| 14 | CH4 | CTH | GDP | ROL | 283.286 | 304.304 |
| 15 | CH4 | CTH | IEF | GOE | 348.953 | 369.971 |
| 16 | CH4 | CTH | IEF | ROL | 370.670 | 391.688 |
| 17 | CDL | WTA | GDP | GOE | 265.952 | 286.970 |
| 18 | CDL | WTA | GDP | ROL | 296.912 | 317.930 |
| 19 | CDL | WTA | IEF | GOE | 369.434 | 390.452 |
| 20 | CDL | WTA | IEF | ROL | 399.998 | 421.016 |
| 21 | CDL | PAR | GDP | GOE | 304.460 | 325.478 |
| 22 | CDL | PAR | GDP | ROL | 335.975 | 356.993 |
| 23 | CDL | PAR | IEF | GOE | 398.885 | 419.903 |
| 24 | CDL | PAR | IEF | ROL | 426.315 | 447.333 |
| 25 | CDL | SHI | GDP | GOE | 293.582 | 314.600 |
| 26 | CDL | SHI | GDP | ROL | 327.330 | 348.348 |
| 27 | CDL | SHI | IEF | GOE | 396.168 | 417.186 |
| 28 | CDL | SHI | IEF | ROL | 396.168 | 417.186 |
| 29 | CDL | CTH | GDP | GOE | 310.326 | 331.344 |
| 30 | CDL | CTH | GDP | ROL | 342.501 | 363.519 |
| 31 | CDL | CTH | IEF | GOE | 396.067 | 417.085 |
| 32 | CDL | CTH | IEF | ROL | 425.192 | 446.210 |
| 33 | NOT | WTA | GDP | GOE | 250.926 | 271.944 |
| 34 | NOT | WTA | GDP | ROL | 283.576 | 304.594 |
| 35 | NOT | WTA | IEF | GOE | 360.028 | 381.046 |
| 36 | NOT | WTA | IEF | ROL | 393.213 | 414.231 |
| 37 | NOT | PAR | GDP | GOE | 286.921 | 307.939 |
| 38 | NOT | PAR | GDP | ROL | 321.098 | 342.116 |
| 39 | NOT | PAR | IEF | GOE | 394.193 | 415.211 |
| 40 | NOT | PAR | IEF | ROL | 429.020 | 450.038 |
| 41 | NOT | SHI | GDP | GOE | 275.485 | 296.503 |
| 42 | NOT | SHI | GDP | ROL | 311.547 | 332.565 |
| 43 | NOT | SHI | IEF | GOE | 384.286 | 405.304 |
| 44 | NOT | SHI | IEF | ROL | 422.457 | 443.475 |
| 45 | NOT | CTH | GDP | GOE | 292.349 | 313.367 |
| 46 | NOT | CTH | GDP | ROL | 326.022 | 347.040 |
| 47 | NOT | CTH | IEF | GOE | 386.928 | 407.946 |
| 48 | NOT | CTH | IEF | ROL | 422.799 | 443.817 |
| 49 | CDL | PAR | GDP | SAV | 312.499 | 333.517 |
| 50 | CDL | PAR | IEF | SAV | 418.835 | 439.853 |
| 51 | CDL | PAR | EEZ | GOE | 398.126 | 419.144 |
| 52 | CDL | PAR | EEZ | ROL | 424.595 | 445.612 |
| 53 | CDL | PAR | EEZ | SAV | 419.222 | 440.24 |
| 54 | CDL | SHI | GDP | SAV | 307.949 | 328.967 |
| 55 | CDL | SHI | IEF | SAV | 423.548 | 444.566 |
| 56 | CDL | SHI | EEZ | GOE | 390.619 | 411.637 |
| 57 | CDL | SHI | EEZ | ROL | 420.433 | 441.451 |
| 58 | CDL | SHI | EEZ | SAV | 418.513 | 439.531 |
| 59 | CDL | FSS | GDP | GOE | 286.987 | 308.005 |
| 60 | CDL | FSS | GDP | ROL | 317.822 | 338.84 |
| 61 | CDL | FSS | GDP | SAV | 317.822 | 338.84 |
| 62 | CDL | FSS | IEF | GOE | 378.84 | 399.858 |
| 63 | CDL | FSS | IEF | ROL | 405.625 | 426.643 |
| 64 | CDL | FSS | EEZ | GOE | 383.503 | 404.521 |
| 65 | CDL | FSS | EEZ | ROL | 411.154 | 432.172 |
| 66 | CDL | FSS | EEZ | SAV | 408.542 | 429.56 |
| 67 | CDL | FSS | IEF | SAV | 408.542 | 429.56 |
| 68 | CDL | CTH | GDP | SAV | 323.688 | 344.706 |
| 69 | CDL | CTH | IEF | SAV | 418.923 | 439.941 |
| 70 | CDL | CTH | EEZ | GOE | 406.336 | 427.354 |
| 71 | CDL | CTH | EEZ | ROL | 433.558 | 454.576 |
| 72 | CDL | CTH | EEZ | SAV | 431.59 | 452.608 |
| 73 | CDL | WTA | GDP | SAV | 274.327 | 295.345 |
| 74 | CDL | WTA | IEF | SAV | 374.778 | 395.796 |
| 75 | CDL | WTA | EEZ | GOE | 368.611 | 389.629 |
| 76 | CDL | WTA | EEZ | ROL | 396.465 | 417.483 |
| 77 | CDL | WTA | EEZ | SAV | 380.691 | 401.709 |
| 78 | CH4 | PAR | GDP | SAV | 252.876 | 273.894 |
| 79 | CH4 | PAR | IEF | SAV | 360.405 | 381.423 |
| 80 | CH4 | PAR | EEZ | GOE | 351.449 | 372.467 |
| 81 | CH4 | PAR | EEZ | ROL | 369.28 | 390.298 |
| 82 | CH4 | PAR | EEZ | SAV | 358.315 | 379.333 |
| 83 | CH4 | SHI | GDP | SAV | 247.729 | 268.747 |
| 84 | CH4 | SHI | IEF | SAV | 364.814 | 385.832 |
| 85 | CH4 | SHI | EEZ | GOE | 343.115 | 364.133 |
| 86 | CH4 | SHI | EEZ | ROL | 366.081 | 387.099 |
| 87 | CH4 | SHI | EEZ | SAV | 424.983 | 446.001 |
| 88 | CH4 | FSS | GDP | GOE | 234.021 | 255.039 |
| 89 | CH4 | FSS | GDP | ROL | 256.424 | 277.442 |
| 90 | CH4 | FSS | GDP | SAV | 235.007 | 256.025 |
| 91 | CH4 | FSS | IEF | GOE | 332.875 | 353.893 |
| 92 | CH4 | FSS | IEF | ROL | 352.712 | 373.73 |
| 93 | CH4 | FSS | IEF | SAV | 340.184 | 361.202 |
| 94 | CH4 | FSS | EEZ | GOE | 338.056 | 359.074 |
| 95 | CH4 | FSS | EEZ | ROL | 358.28 | 379.297 |
| 96 | CH4 | FSS | EEZ | SAV | 358.28 | 379.297 |
| 97 | CH4 | CTH | GDP | SAV | 262.733 | 283.751 |
| 98 | CH4 | CTH | IEF | SAV | 356.709 | 377.727 |
| 99 | CH4 | CTH | EEZ | GOE | 358.98 | 379.998 |
| 100 | CH4 | CTH | EEZ | ROL | 377.22 | 398.238 |
| 101 | CH4 | CTH | EEZ | SAV | 368.648 | 389.666 |
| 102 | CH4 | WTA | GDP | SAV | 209.831 | 230.849 |
| 103 | CH4 | WTA | IEF | SAV | 311.589 | 332.607 |
| 104 | CH4 | WTA | EEZ | GOE | 308.292 | 329.31 |
| 105 | CH4 | WTA | EEZ | ROL | 327.016 | 348.034 |
| 106 | CH4 | WTA | EEZ | SAV | 312.948 | 333.966 |
| 107 | NOT | PAR | GDP | SAV | 295.195 | 316.213 |
| 108 | NOT | PAR | IEF | SAV | 419.522 | 440.54 |
| 109 | NOT | PAR | EEZ | GOE | 388.724 | 409.742 |
| 110 | NOT | PAR | EEZ | ROL | 419.558 | 440.576 |
| 111 | NOT | PAR | EEZ | SAV | 413.356 | 434.374 |
| 112 | NOT | SHI | GDP | SAV | 290.543 | 311.561 |
| 113 | NOT | SHI | IEF | SAV | 420.208 | 441.226 |
| 114 | NOT | SHI | EEZ | GOE | 376.823 | 397.841 |
| 115 | NOT | SHI | EEZ | ROL | 409.717 | 430.735 |
| 116 | NOT | SHI | EEZ | SAV | 409.717 | 430.735 |
| 117 | NOT | FSS | GDP | GOE | 278.639 | 299.657 |
| 118 | NOT | FSS | GDP | ROL | 311.211 | 332.229 |
| 119 | NOT | FSS | GDP | SAV | 283.774 | 304.792 |
| 120 | NOT | FSS | IEF | GOE | 377.465 | 398.483 |
| 121 | NOT | FSS | IEF | ROL | 410.223 | 431.241 |
| 122 | NOT | FSS | IEF | SAV | 402.265 | 423.283 |
| 123 | NOT | FSS | EEZ | GOE | 377.515 | 398.533 |
| 124 | NOT | FSS | EEZ | ROL | 407.168 | 428.186 |
| 125 | NOT | FSS | EEZ | SAV | 405.686 | 426.704 |
| 126 | NOT | CTH | GDP | SAV | 305.212 | 326.23 |
| 127 | NOT | CTH | IEF | SAV | 420.603 | 441.621 |
| 128 | NOT | CTH | EEZ | GOE | 393.174 | 414.192 |
| 129 | NOT | CTH | EEZ | ROL | 423.648 | 444.666 |
| 130 | NOT | CTH | EEZ | SAV | 425.521 | 446.539 |
| 131 | NOT | WTA | GDP | SAV | 256.99 | 278.008 |
| 132 | NOT | WTA | IEF | SAV | 366.205 | 387.223 |
| 133 | NOT | WTA | EEZ | GOE | 358.966 | 379.984 |
| 134 | NOT | WTA | EEZ | ROL | 387.863 | 408.881 |
| 135 | NOT | WTA | EEZ | SAV | 373.948 | 394.966 |


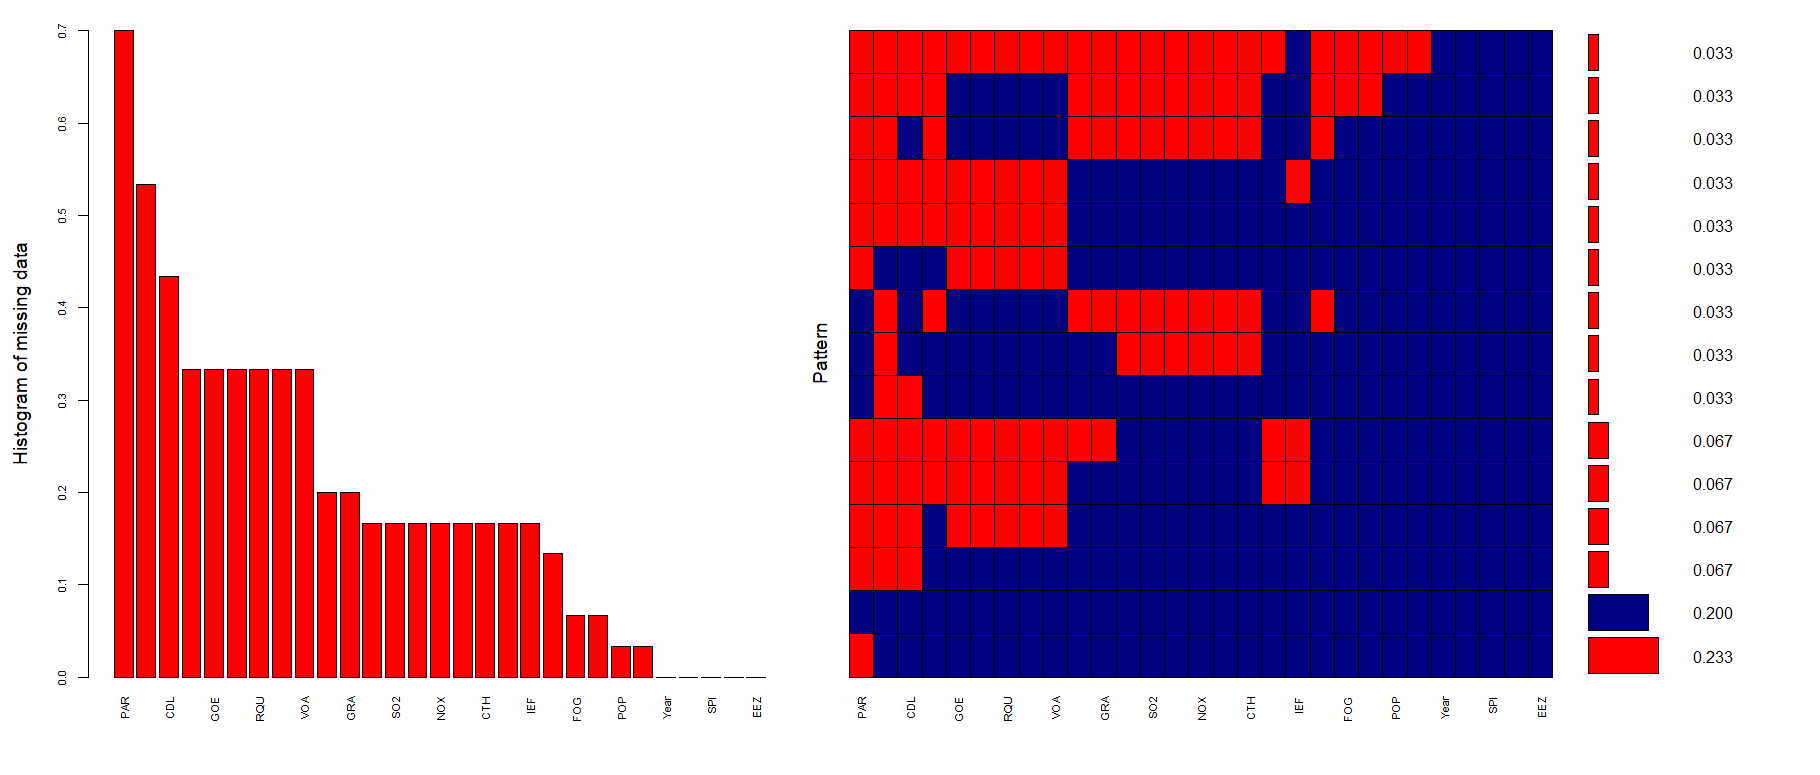


**Figure S1:** Distribution and Pattern of Missing Data.


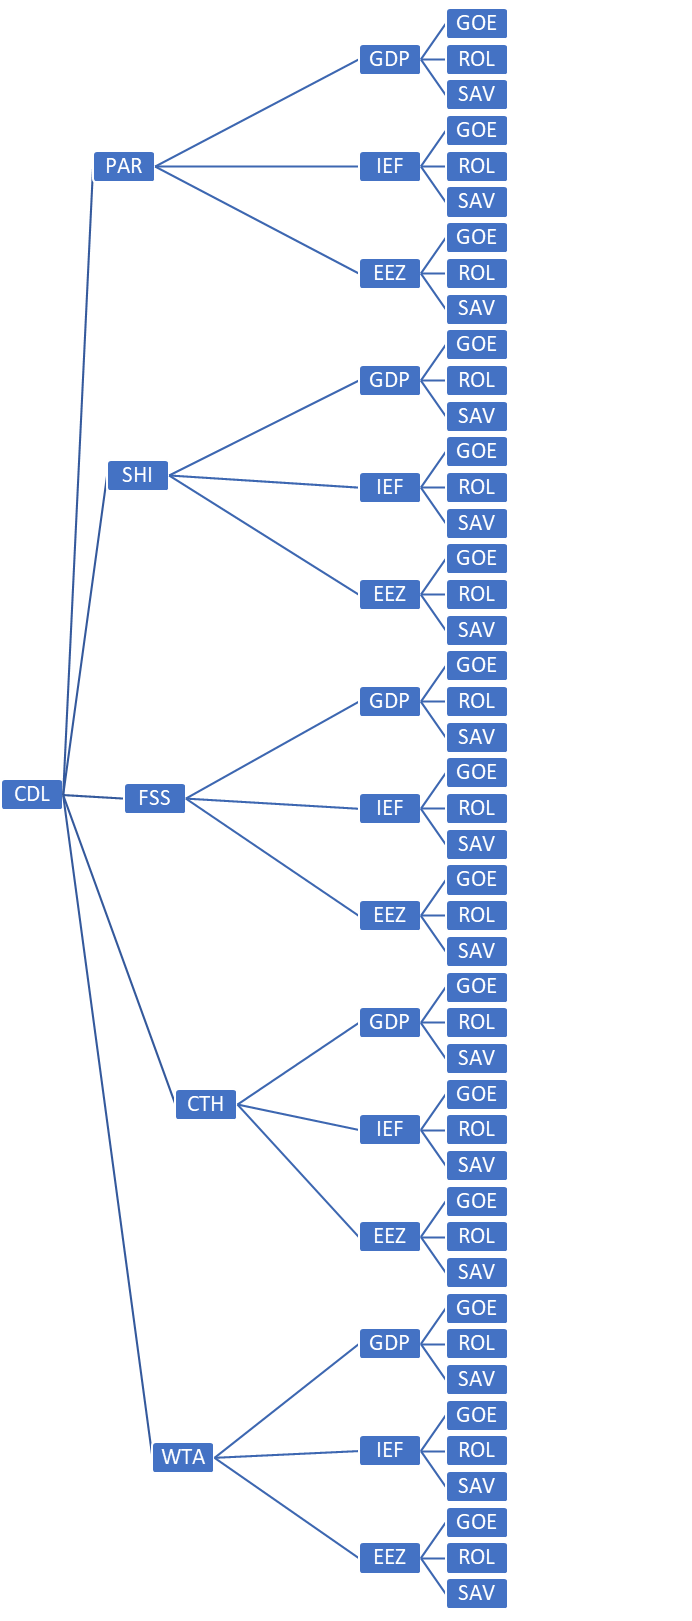

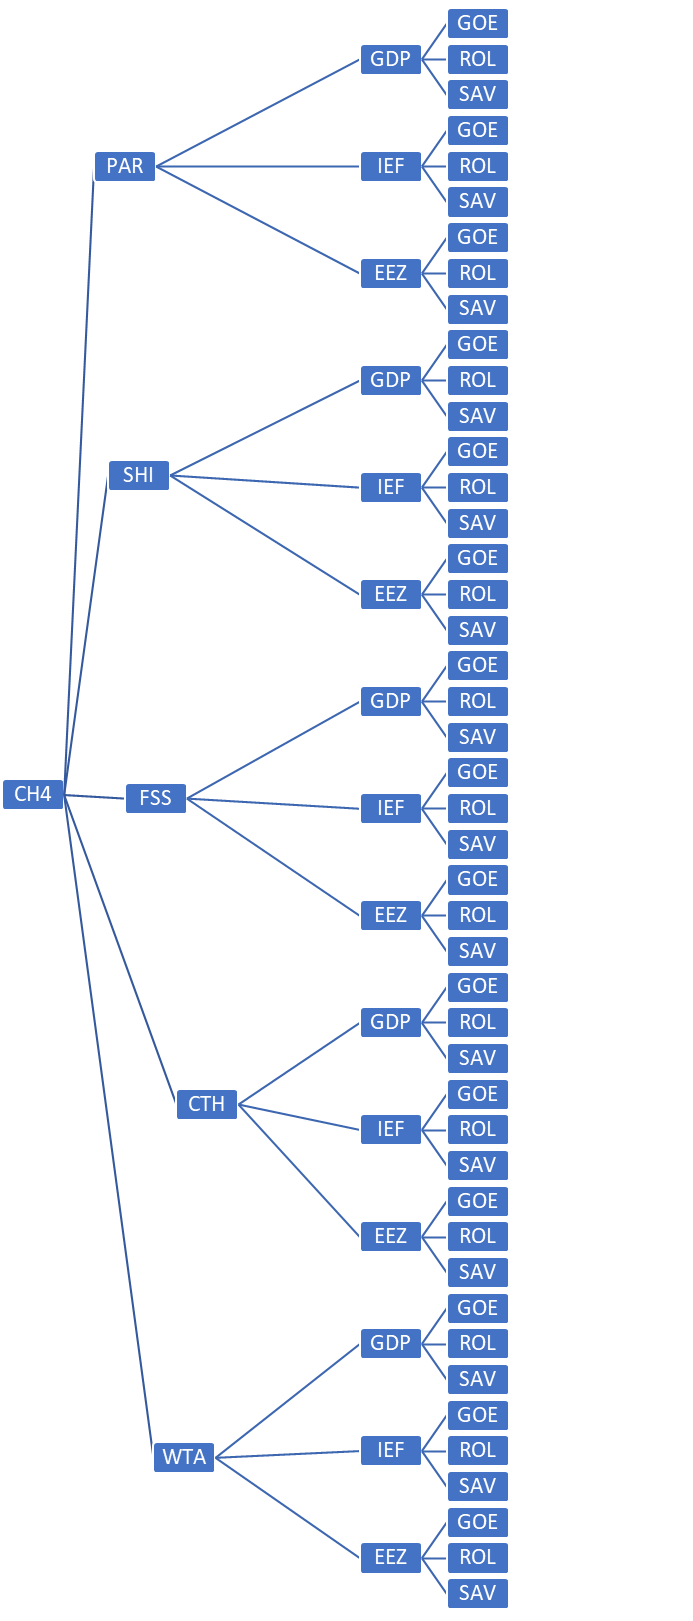

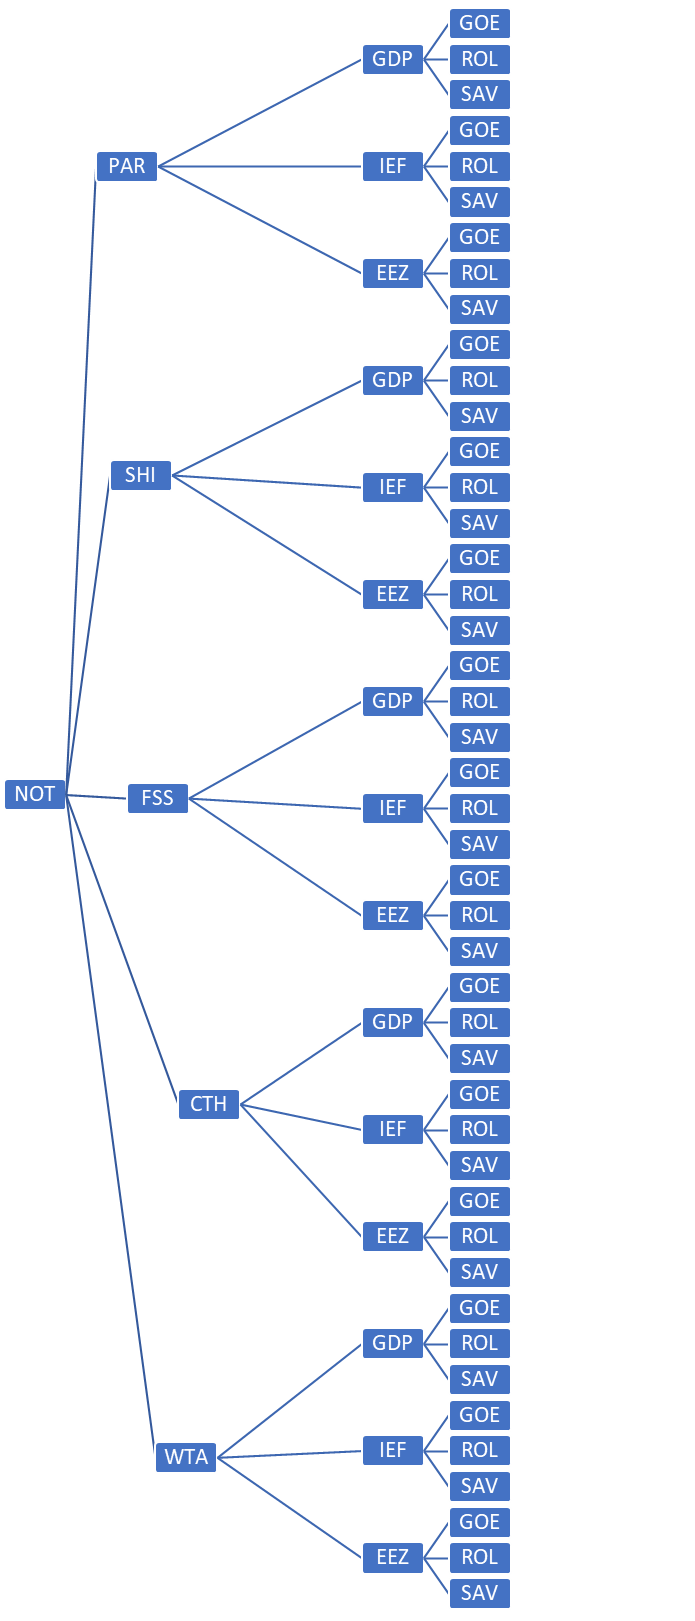


**Figure S2**: Possible combinations of indicators selected following Method 2 (see subsection ‘Selection of indicators to represent each of the 5 variables’ in Method section). Each acronym represents an indicator of a given variable and the meaning of each acronym as well as the corresponding variable are in Table S1.
