# Supplementary material for: Biodiversity and Economy but Not Social Factors Predict Human Population Dynamics in South Africa
Source: Preprints.org preprint supplement (doi:10.20944/preprints202206.0011.v1), 2022-06-01
Supplement: Supplementary file 2 [file Table S2.1.xls]

## Sheet: Sheet1
Year	POP	POP_D	AMP	PAR	SHI	SPI	BLC	SO2	CDL	CH4	FOG	NOT	NOX	SNM	FSS	CTH	TPA	WTA	GRA	CCO	GOE	ROL	RQU	SAV	SEG	VOA	EEZ	GDP	IEF
1990	36800509	30.3362	823.727	NA	NA	64.1399	63.5513	2218.02	NA	2247.42	842	67.3	1129.8	0.8378	0.546998	652121	23435	NA	NA	NA	NA	NA	NA	NA	NA	NA	2.11502e+06	3.64333e+11	NA
1991	37718950	31.0933	823.727	NA	NA	66.2495	63.6944	2124.43	NA	2276.14	714	67.4	1110.81	0.809184	0.605963	577933	11679.1	NA	NA	NA	NA	NA	NA	NA	NA	NA	1.55024e+06	3.60623e+11	NA
1992	38672607	31.8794	823.727	NA	NA	66.9845	63.5266	2067.65	NA	2251.28	664	73	1105.48	1.06379	0.627267	812050	12029.8	2599.11	217891	NA	NA	NA	NA	NA	NA	NA	1.55024e+06	3.52917e+11	NA
1993	39633750	32.6717	823.727	NA	NA	67.3145	67.8319	2049.96	NA	2306.59	598	73.3	1125.75	0.812431	0.630957	666266	12171.7	2597.85	217876	NA	NA	NA	NA	NA	NA	NA	1.55024e+06	3.5727e+11	NA
1994	40564059	33.4386	823.727	NA	NA	68.1655	67.6891	2093.99	NA	2330.02	533	72.9	1155.25	0.687487	0.587711	628678	12266.3	2596.68	217862	NA	NA	NA	NA	NA	55.2829	NA	1.55024e+06	3.68702e+11	NA
1995	41435758	34.1572	823.727	NA	NA	68.3659	67.3258	2144.67	NA	2359.71	562	73.4	1233.87	0.972647	0.535068	684756	12654.5	2594.34	218103	NA	NA	NA	NA	NA	56.0782	NA	1.55024e+06	3.80132e+11	60.7
1996	42241011	34.821	823.727	NA	NA	68.8591	66.0256	2298.09	NA	2399.74	963	80.2	1253.62	0.726315	0.487991	511788	12707.4	2593.98	218261	0.732927	1.0205	0.0879292	0.515014	-0.377169	57.06	0.841139	1.55024e+06	3.96478e+11	62.5
1997	42987461	35.4363	823.727	NA	NA	69.0873	66.8	2420.12	NA	2479.25	1070	80.9	1295.92	0.767139	0.410941	598797	12875.2	2595.33	218621	0.674444	NA	NA	NA	NA	57.8371	NA	1.55024e+06	4.06786e+11	63.2
1998	43682260	36.0091	823.727	NA	NA	70.2106	64.0939	2485	NA	2527.99	1090	80.7	1337.75	0.821379	0.380615	625488	12992	2597.13	219033	0.625336	0.657637	0.270558	0.328826	-0.543384	58.196	0.846978	1.55024e+06	4.0882e+11	64.3
1999	44338543	36.5501	823.727	NA	NA	70.7633	62.313	2296.56	NA	2548.12	1120	77.8	1259.47	0.801099	0.355039	650972	13099.3	2609.91	220429	0.354517	NA	NA	NA	NA	59.2553	NA	1.55024e+06	4.18632e+11	63.3
2000	44967708	37.0687	823.727	0.0585072	NA	71.1601	63.0838	2290.94	NA	2561.24	1000	73.6	1271.93	0.678092	0.255937	711506	13151.7	2617.65	220336	0.354515	0.729057	0.202503	0.436383	-0.225485	59.0705	0.74624	1.55024e+06	4.36214e+11	63.7
2001	45571274	37.5663	1955.84	NA	100	73.3925	69.127	2107.2	24515.7	2582.04	1010	72.1	1190.4	0.761435	0.190364	835403	13342.3	2616.93	220530	0.46451	NA	NA	NA	NA	58.4589	NA	1.55024e+06	4.47992e+11	63.8
2002	46150913	38.0441	2067.6	NA	99.96	73.5857	74.5186	2141.35	16026.5	2578.73	1070	77.9	1218.87	0.732791	0.122905	845800	13681.4	2634.03	220518	0.568106	0.673051	0.132499	0.655617	-0.253671	58.2647	0.659822	1.55024e+06	4.6457e+11	64
2003	46719196	38.5126	2067.6	NA	99.91	73.6203	78.9754	2300.42	28366.4	2674.83	1330	75	1302.06	0.771685	0.11065	902273	13729.4	2649.51	220649	0.452249	0.692696	0.124147	0.804242	-0.311745	60.0857	0.700217	1.55024e+06	4.7827e+11	67.1
2004	47291610	38.9844	2067.6	NA	99.86	73.6203	84.0712	2463.8	24372.4	2725	1490	75.2	1369.91	0.70752	0.108817	971967	13736.8	2669.85	220668	0.248784	0.64122	0.113917	0.658264	-0.131361	60.1254	0.715737	1.55024e+06	5.00053e+11	66.3
2005	47880601	39.4699	4382.45	0.0703907	99.84	73.7523	87.9223	2436.16	31716.2	2763.97	1550	76.2	1356.5	0.567157	0.122784	896180	13736.8	2664.54	220628	0.211263	0.642373	0.114751	0.703134	-0.162605	60.1015	0.64901	1.55024e+06	5.26441e+11	62.9
2006	48489459	39.9719	4382.45	NA	99.83	73.7724	92.9514	2385.64	34334.8	2770.36	1670	71.8	1340.43	0.734524	0.197416	681469	13763.7	2664.54	220476	0.182197	0.444541	0.255048	0.683413	0.0481969	60.7132	0.651613	1.55024e+06	5.55942e+11	63.7
2007	49119759	40.4914	4382.45	NA	99.81	73.8241	105.235	2443.93	17380.7	2797.75	1730	73.4	1387.68	0.781871	0.24863	746467	13768.2	2662.11	220372	0.131468	0.469179	0.0949021	0.491187	0.215835	60.1748	0.578765	1.55024e+06	5.85743e+11	63.5
2008	49779471	41.0353	4382.45	NA	99.79	73.965	111.06	2729.26	23164.6	2857.37	1720	71.8	1475.44	0.530141	0.291413	709459	13819	2660.58	220172	0.061732	0.509499	0.0725051	0.498898	0.0497333	59.0687	0.575648	1.55024e+06	6.04435e+11	63.4
2009	50477011	41.6103	4413.09	NA	99.76	74.2451	107.58	2721.76	20211.5	2840.9	1790	72	1376.36	0.540931	0.279006	570058	13836.6	2660.58	219932	-0.115579	0.480264	0.123987	0.407537	-0.113299	60.5099	0.570503	1.55024e+06	5.95138e+11	63.8
2010	51216964	42.2203	4413.09	0.0800676	99.75	74.38	88.8562	2619.82	15642.5	2887.64	1440	71.5	1389.18	0.497832	0.299651	693587	13885.2	2662.02	219826	-0.0700488	0.392141	0.141176	0.36341	-0.029427	61.0192	0.60207	1.55024e+06	6.13228e+11	62.8
2011	52004172	42.8692	4413.09	0.0800676	99.74	74.4776	95.7854	2475.82	19407.5	2895.52	1510	71	1330.61	0.564281	0.260842	593444	13931.3	2662.83	219727	-0.0615351	0.405351	0.152451	0.406776	0.0240316	60.8747	0.590839	1.55024e+06	6.33368e+11	62.7
2012	52834005	43.5532	4659.08	0.0822999	99.72	74.8572	106.05	2569.84	28805.9	2943.74	3870	71.9	1338.81	0.564867	0.358414	771943	13955.4	2665.26	219703	0.0251445	0.345631	0.110432	0.381753	-0.0253867	61.2851	0.582153	1.55024e+06	6.47387e+11	62.7
2013	53689236	44.2582	4659.08	0.0822999	99.7	75.2403	112.211	2611.66	32447.2	2949.39	3510	70.7	1372.51	0.564202	0.363025	474278	14060.4	2663.19	219623	0.118391	0.438292	0.158148	0.419976	-0.0462945	61.1674	0.600703	1.55024e+06	6.63475e+11	61.8
2014	54545991	44.9645	174595	0.0845492	99.67	76.6766	111.733	2643.06	36021.2	2984.35	2830	71.9	1361.04	0.469155	0.335999	666426	14143.9	2652.03	219556	-0.0218271	0.341089	0.18279	0.287686	-0.146389	61.0207	0.642118	1.55024e+06	6.7573e+11	62.5
2015	55386367	45.6573	174595	0.0845492	NA	77.0542	NA	NA	39846.3	NA	2960	69.1	NA	0.621727	NA	NA	14600.3	2651.13	219534	-0.021569	0.291809	0.0882275	0.279379	-0.212993	61.3688	0.650173	1.55024e+06	6.83796e+11	62.6
2016	56203654	46.331	174595	0.0987503	NA	78.1062	NA	NA	36364	NA	3100	67.2	NA	NA	NA	NA	14721.1	NA	NA	NA	0.30644	0.116231	0.211843	-0.141504	61.0206	0.647684	1.55024e+06	6.86525e+11	61.9
2017	57000451	46.9878	174595	NA	NA	78.3981	NA	NA	56219.8	NA	3240	70.7	NA	NA	NA	NA	15244.1	NA	NA	NA	0.288611	-0.0378556	0.233145	-0.277548	61.4938	0.630973	1.55024e+06	6.96236e+11	62.3
2018	57779622	47.6301	174595	NA	NA	79.3162	NA	NA	NA	NA	NA	NA	NA	NA	NA	NA	15335.3	NA	NA	NA	0.340379	-0.102496	0.171912	-0.276673	61.3508	0.65739	1.55024e+06	7.01716e+11	63
2019	NA	NA	174595	NA	NA	79.3767	NA	NA	NA	NA	NA	NA	NA	NA	NA	NA	15777.7	NA	NA	NA	NA	NA	NA	NA	NA	NA	1.55024e+06	NA	58.3
