# Supplementary material for: Biodiversity and Economy but Not Social Factors Predict Human Population Dynamics in South Africa
Source: Preprints.org preprint supplement (doi:10.20944/preprints202206.0011.v1), 2022-06-01
Supplement: Supplementary file 3 [file Table S2.2.xls]

## Sheet: Sheet1
Year	POP	POP_D	AMP	PAR	SHI	SPI	BLC	SO2	CDL	CH4	FOG	NOT	NOX	SNM	FSS	CTH	TPA	WTA	GRA	CCO	GOE	ROL	RQU	SAV	SEG	VOA	EEZ	GDP	IEF
1990	-1.79795	-1.79795	-0.513801	0.353387	-1.42348	-2.14651	-1.06278	-0.800902	0.212941	-1.70914	-0.863518	-1.5906	-1.66657	1.03863	1.3224	-0.350374	4.66604	-0.686479	-1.44235	1.30907	0.563933	-0.118836	0.00220344	-0.869068	-0.777248	2.10501	5.29465	-1.26606	-0.74425
1991	-1.64429	-1.64429	-0.513801	-1.50203	1.3782	-1.62151	-1.05539	-1.25666	0.562753	-1.58871	-0.992161	-1.5631	-1.84967	0.846972	1.70379	-0.974267	-1.10967	-0.932138	-1.67567	0.694283	2.09249	1.55431	-0.453652	-0.869068	-0.818588	-0.210454	-0.182574	-1.29608	-0.281846
1992	-1.48473	-1.48473	-0.513801	0.545497	-1.42348	-1.43861	-1.06406	-1.53317	0.562753	-1.69296	-1.04241	-0.0229193	-1.90104	2.55224	1.84158	0.994551	-0.937364	-1.31007	-1.66031	0.273817	0.329271	1.75255	-0.100291	-0.115515	0.370811	0.8587	-0.182574	-1.35843	-0.083673
1993	-1.32392	-1.32392	-0.513801	0.545497	-1.16878	-1.35649	-0.841726	-1.61933	2.53969	-1.46107	-1.10874	0.0595903	-1.70562	0.86872	1.86545	-0.231421	-0.867624	-1.35417	-1.67567	0.694283	0.323895	-0.120884	0.344566	-0.869068	-0.818588	0.8587	-0.182574	-1.32321	0.444788
1994	-1.16827	-1.16827	-0.513801	0.353387	1.3782	-1.14472	-0.849101	-1.40493	0.5963	-1.3628	-1.17407	-0.0504225	-1.42118	0.0318871	1.58574	-0.547523	-0.821165	-1.39511	-1.69085	1.49679	0.329271	0.242943	-0.669695	-1.6948	-2.56951	0.8587	-0.182574	-1.23071	-0.083673
1995	-1.02242	-1.02242	-0.513801	0.739065	0.0198098	-1.09482	-0.867863	-1.15813	0.562753	-1.23833	-1.14492	0.0870935	-0.663259	1.94179	1.24524	-0.0759336	-0.630422	-1.477	-1.44235	1.0903	0.733485	0.630733	0.392732	-1.6948	-2.09146	0.8587	-0.182574	-1.13823	-1.53694
1996	-0.887693	-0.887693	-0.513801	-1.50203	1.3782	-0.972113	-0.935005	-0.410984	0.562753	-1.07048	-0.74191	1.95731	-0.472885	0.29194	0.940745	-1.53052	-0.60444	-1.48959	-1.27992	1.72035	2.09249	-0.581763	0.493408	-0.869068	-1.50137	2.03277	-0.182574	-1.00597	-0.347904
1997	-0.762804	-0.762804	-0.513801	0.353387	1.0386	-0.91531	-0.895014	0.183285	-1.39423	-0.737117	-0.634372	2.14983	-0.0651034	0.565369	0.442382	-0.798807	-0.52201	-1.44235	-0.909901	1.49679	2.09249	-0.581763	-0.669695	-0.544048	-1.03427	0.481315	-0.182574	-0.922561	0.1145
1998	-0.646556	-0.646556	-0.513801	0.545497	1.0386	-0.635781	-1.03476	0.499222	-1.06331	-0.532792	-0.614271	2.09483	0.338236	0.928647	0.246234	-0.57435	-0.464612	-1.37936	-0.486201	1.30907	0.400448	1.75255	-0.669695	-1.6948	-0.818588	2.10501	-0.182574	-0.906104	0.841134
1999	-0.536752	-0.536752	-0.513801	-1.50203	1.3782	-0.49824	-1.12673	-0.418457	-0.143452	-0.448393	-0.584121	1.29723	-0.416494	0.79282	0.0808056	-0.36004	-0.411928	-0.932138	0.949087	0.273817	0.472327	-0.012075	-0.17799	-0.0534569	-0.181893	0.481315	-0.182574	-0.826715	0.180558
2000	-0.431486	-0.431486	-0.513801	-1.50203	0.614105	-0.399484	-1.08692	-0.44579	-0.695586	-0.393384	-0.704724	0.1421	-0.296385	-0.0310377	-0.560189	0.149026	-0.386181	-0.661283	0.853945	0.273811	0.733485	0.882695	0.00220344	-0.115515	-0.29296	0.8587	-0.182574	-0.684451	0.444788
2001	-0.330502	-0.330502	-0.497646	0.545497	1.3782	0.156058	-0.774845	-1.34057	-0.563356	-0.306151	-0.694673	-0.270448	-1.08232	0.527165	-0.984321	1.19094	-0.292526	-0.686479	1.05321	0.694283	0.563933	-0.249587	1.37175	-0.869068	-0.660551	-0.210454	-0.182574	-0.589154	0.510846
2002	-0.233522	-0.233522	-0.496051	-1.50203	1.0386	0.204156	-0.49642	-1.1743	-1.39423	-0.320049	-0.634372	1.32474	-0.807919	0.335315	-1.42064	1.27837	-0.125933	-0.0880801	1.0409	1.0903	0.472327	-0.012075	1.37175	-0.25554	-0.777248	-0.210454	-0.182574	-0.455022	0.642961
2003	-0.138442	-0.138442	-0.496051	0.353387	0.614105	0.212762	-0.266268	-0.399623	-0.186463	0.0828878	-0.373065	0.527145	-0.0058211	0.595814	-1.49991	1.75329	-0.102341	0.453628	1.17575	0.647414	0.563933	-0.118836	2.3002	-0.544048	0.317232	0.289305	-0.182574	-0.344168	2.69075
2004	-0.0426702	-0.0426702	-0.496051	0.353387	0.189608	0.212762	-0.00311578	0.39599	-0.577375	0.293229	-0.212261	0.582151	0.648274	0.166057	-1.51177	2.33938	-0.0987098	1.16541	1.19537	-0.130363	0.323895	-0.249587	1.38828	0.35208	0.341096	0.481315	-0.182574	-0.167916	2.16229
2005	0.0558747	0.0558747	-0.463018	-0.479378	0.0198098	0.245612	0.195761	0.261364	0.141394	0.456619	-0.15196	0.857183	0.518935	-0.77404	-1.42143	1.70205	-0.0987098	0.97959	1.15335	-0.273792	0.329271	-0.23893	1.66858	0.196864	0.326727	-0.344216	-0.182574	0.0455966	-0.083673
2006	0.157744	0.157744	-0.463018	0.545497	-0.0650895	0.250601	0.455469	0.0153525	0.397698	0.483405	-0.0313568	-0.352958	0.364006	0.346923	-0.938709	-0.103576	-0.085498	0.97959	0.997122	-0.384904	-0.59324	1.55431	1.54539	1.2441	0.694434	-0.312016	-0.182574	0.284294	0.444788
2007	0.2632	0.2632	-0.463018	-1.50203	-0.234888	0.263466	1.08979	0.299233	-1.26169	0.598261	0.0289447	0.0870935	0.819568	0.664037	-0.607452	0.443026	-0.083274	0.894554	0.89078	-0.578823	-0.478348	-0.492637	0.344566	2.07691	0.370811	-1.21328	-0.182574	0.525422	0.312673
2008	0.373577	0.373577	-0.463018	-0.479378	-0.404687	0.298549	1.39061	1.68871	-0.695586	0.848249	0.0188945	-0.352958	1.66566	-1.02196	-0.330734	0.131811	-0.058303	0.841013	0.684483	-0.8454	-0.290334	-0.778911	0.392732	1.25174	-0.29402	-1.25184	-0.182574	0.676658	0.246615
2009	0.490284	0.490284	-0.462581	-0.479378	-0.659385	0.368253	1.21088	1.65218	-0.984624	0.779194	0.0892462	-0.297951	0.710424	-0.949693	-0.410983	-1.04049	-0.0496482	0.841013	0.437648	-1.5232	-0.426656	-0.120884	-0.17799	0.441809	0.572241	-1.3155	-0.182574	0.601436	0.510846
2010	0.614087	0.614087	-0.462581	0.353387	-0.744284	0.401816	0.243986	1.15578	-1.43182	0.975168	-0.262513	-0.435467	0.834006	-1.23836	-0.277447	-0.0016654	-0.0257766	0.891405	0.328808	-1.34915	-0.837584	0.0988211	-0.453652	0.858478	0.878364	-0.92496	-0.182574	0.747811	-0.149731
2011	0.745795	0.745795	-0.462581	0.353387	-0.829183	0.426109	0.601818	0.45452	-1.06331	1.00818	-0.192161	-0.572983	0.269367	-0.793307	-0.528467	-0.843825	-0.00312481	0.91975	0.227464	-1.31661	-0.775983	0.242943	-0.18275	1.12405	0.791509	-1.06391	-0.182574	0.910764	-0.215788
2012	0.884636	0.884636	-0.459071	0.545497	-0.998982	0.520578	1.13187	0.912379	-0.143452	1.21036	2.1797	-0.325455	0.348447	-0.78938	0.102636	0.657272	0.00868929	1.00479	0.20266	-0.985262	-1.05446	-0.294141	-0.339063	0.87855	1.03815	-1.17136	-0.182574	1.02419	-0.215788
2013	1.02773	1.02773	-0.459071	0.545497	-1.16878	0.615909	1.45007	1.11602	0.212941	1.23406	1.81789	-0.655493	0.673315	-0.793835	0.132456	-1.84595	0.0602782	0.932348	0.120382	-0.62881	-0.622375	0.31576	-0.100291	0.774682	0.967447	-0.941863	-0.182574	1.15437	-0.810307
2014	1.17107	1.17107	1.96593	0.739065	-1.42348	0.973329	1.42537	1.26892	0.562753	1.38065	1.13447	-0.325455	0.562701	-1.43043	-0.0423453	-0.230079	0.101313	0.541814	0.0510606	-1.16482	-1.07564	0.630733	-0.926697	0.277424	0.879266	-0.429485	-0.182574	1.25352	-0.347904
2015	1.31168	1.31168	1.96593	0.739065	-0.998982	1.06731	1.13187	0.39599	0.937128	0.293229	1.26513	-1.09554	0.819568	-0.408549	-0.0423453	0.994551	0.325533	0.510319	0.0291259	-1.16383	-1.30544	-0.57795	-0.978591	-0.0534569	1.0885	-0.329832	-0.182574	1.31879	-0.281846
2016	1.44842	1.44842	1.96593	1.96117	-0.659385	1.3291	1.45007	1.65218	0.5963	1.38065	1.40583	-1.61811	0.648274	-1.02196	-0.0423453	-0.843825	0.384896	0.932348	0.20266	-0.8454	-1.23722	-0.220013	-1.40048	0.301692	0.879177	-0.360624	-0.182574	1.34087	-0.74425
2017	1.58173	1.58173	1.96593	1.96117	0.0198098	1.40173	1.42537	0.0153525	2.53969	0.0828878	1.54653	-0.655493	1.66566	-0.78938	0.0808056	-0.0759336	0.641845	0.510319	0.437648	-1.16482	-1.32036	-2.18952	-1.26741	-0.374159	1.16358	-0.567366	-0.182574	1.41945	-0.480019
2018	1.71209	1.71209	1.96593	-0.479378	-0.659385	1.63022	-1.08692	0.39599	0.397698	0.779194	1.40583	-0.655493	0.819568	-1.43043	-0.410983	-0.231421	0.686652	0.894554	0.0291259	-0.130363	-1.07896	-3.01573	-1.64993	-0.369814	1.07767	-0.240546	-0.182574	1.46378	-0.0176154
2019	0.614087	0.614087	1.96593	-1.50203	1.3782	1.64528	0.243986	-0.399623	0.212941	0.975168	1.26513	-0.325455	0.648274	-1.02196	-0.560189	-0.974267	0.904013	0.541814	0.20266	-0.578823	-1.32036	0.31576	-1.40048	2.07691	0.879266	-1.17136	-0.182574	0.747811	-3.12233
